# Supplementary material for: SARS-CoV-2 S protein activates NLRP3 inflammasome and deregulates coagulation factors in endothelial and immune cells
Source: Springer Nature journal article supplement (doi:10.1186/s12964-023-01397-6), 2024-01-15

Figure 1

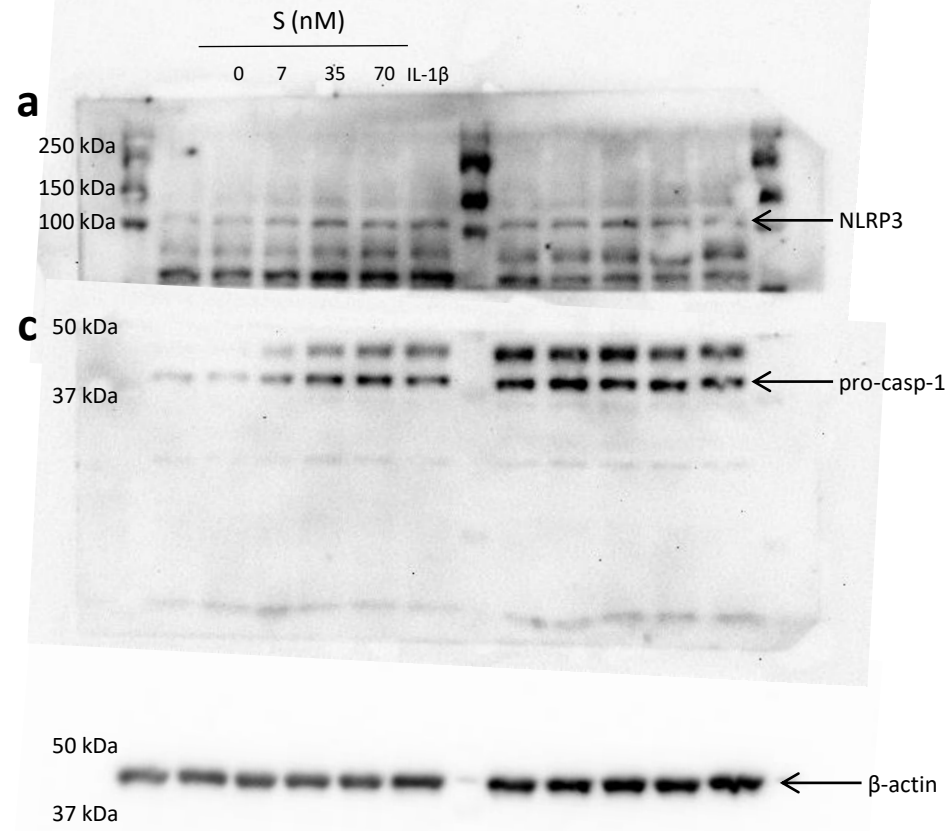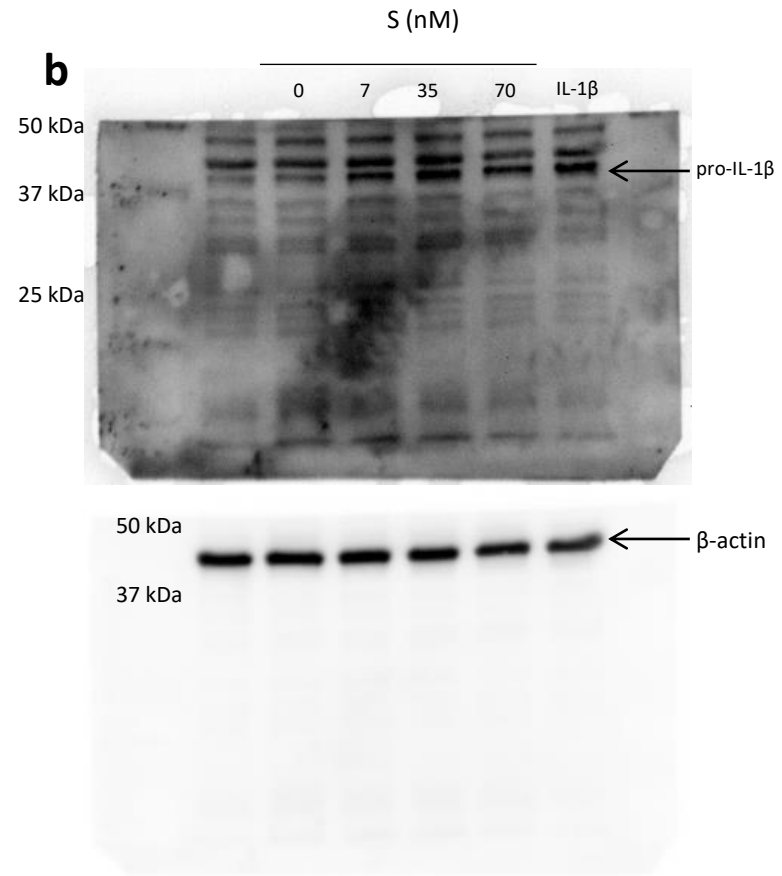

Figure 1

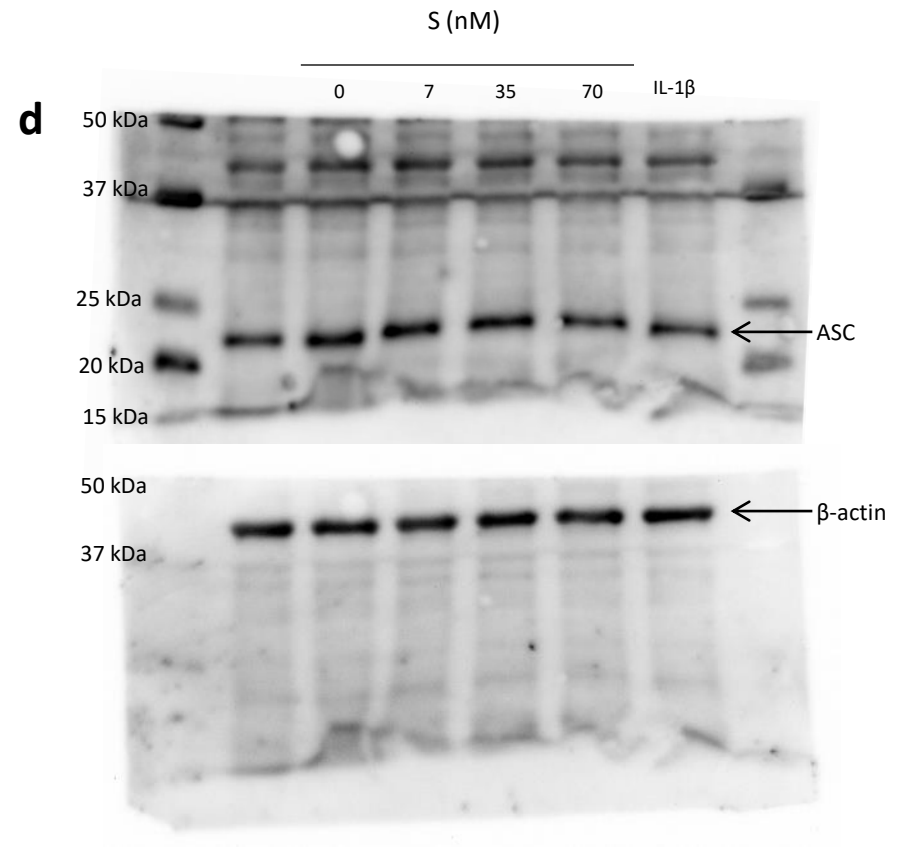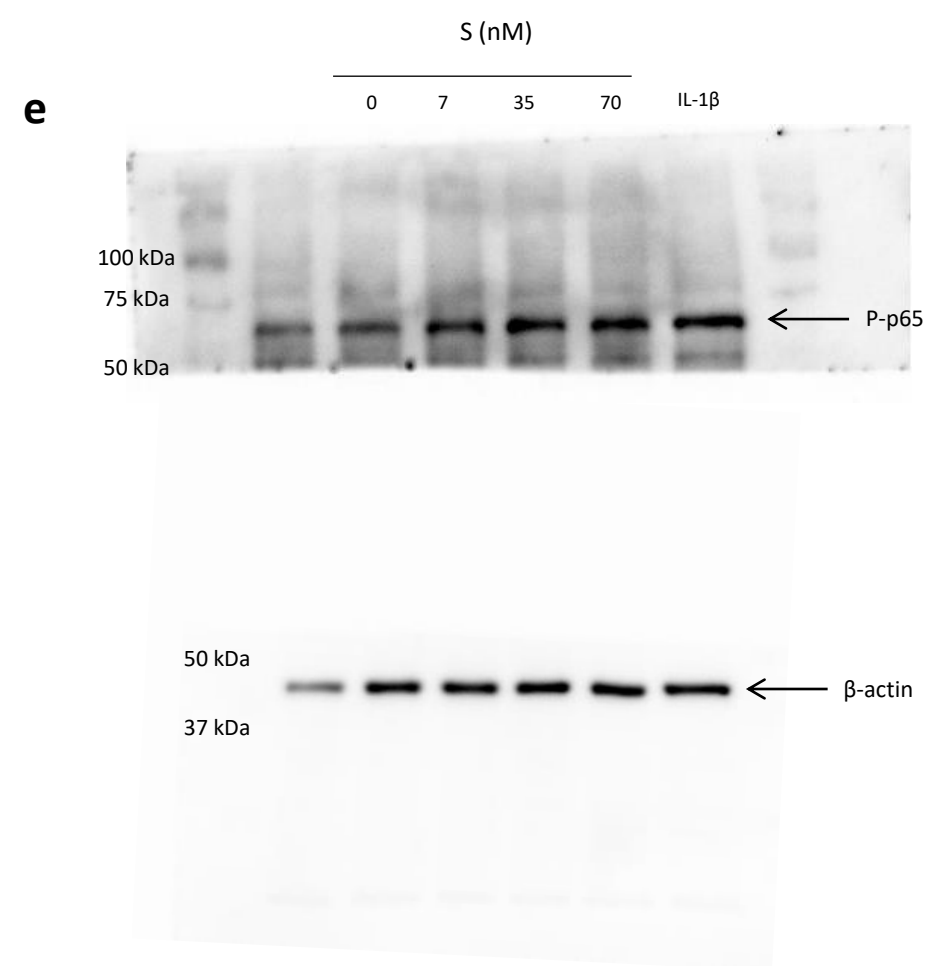

Figure 2

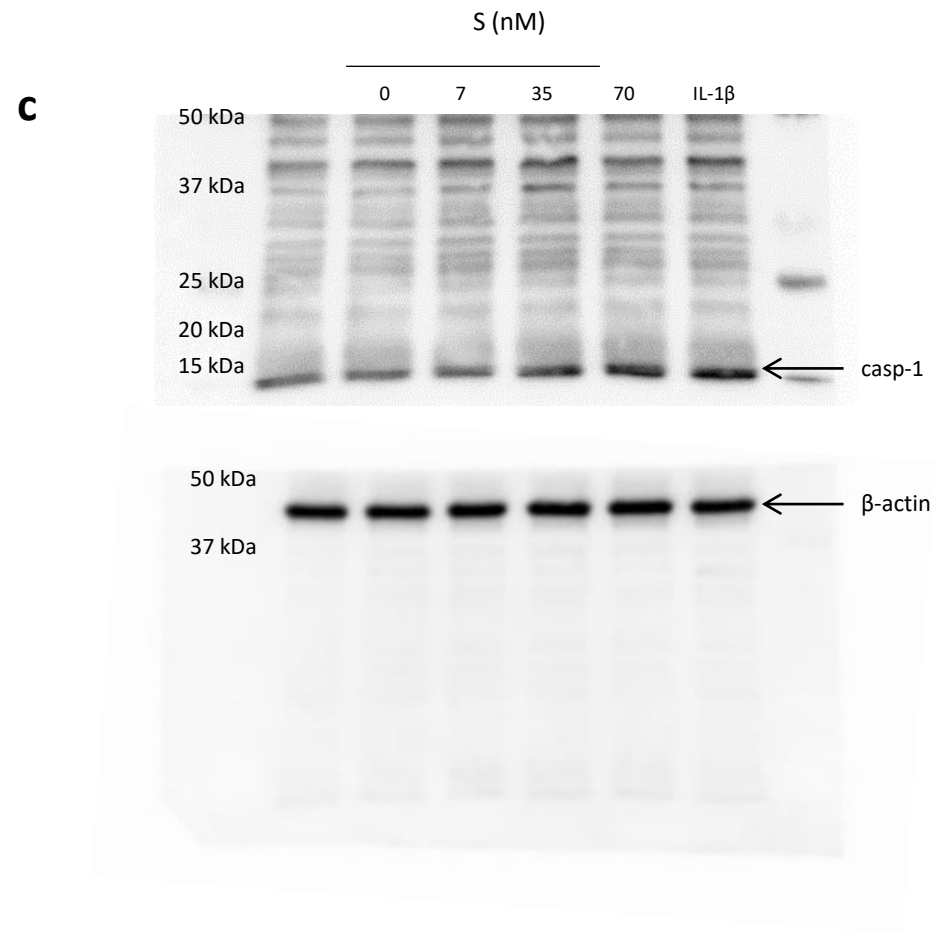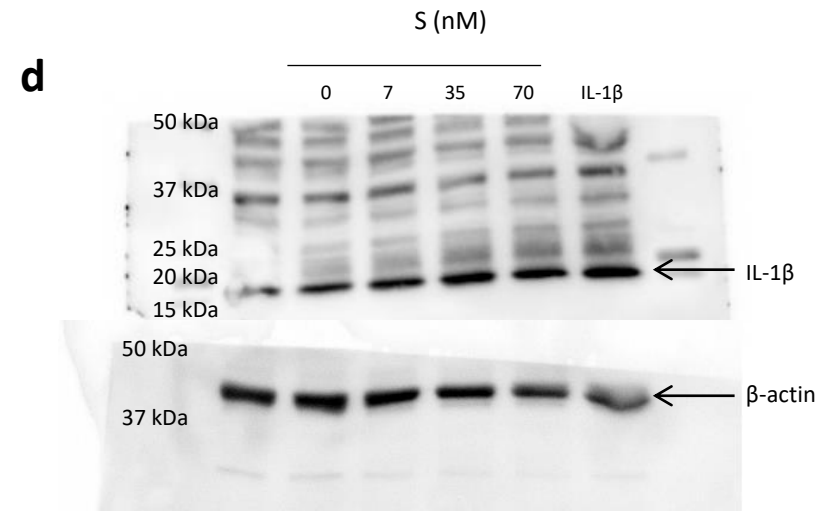

Figure 2

f

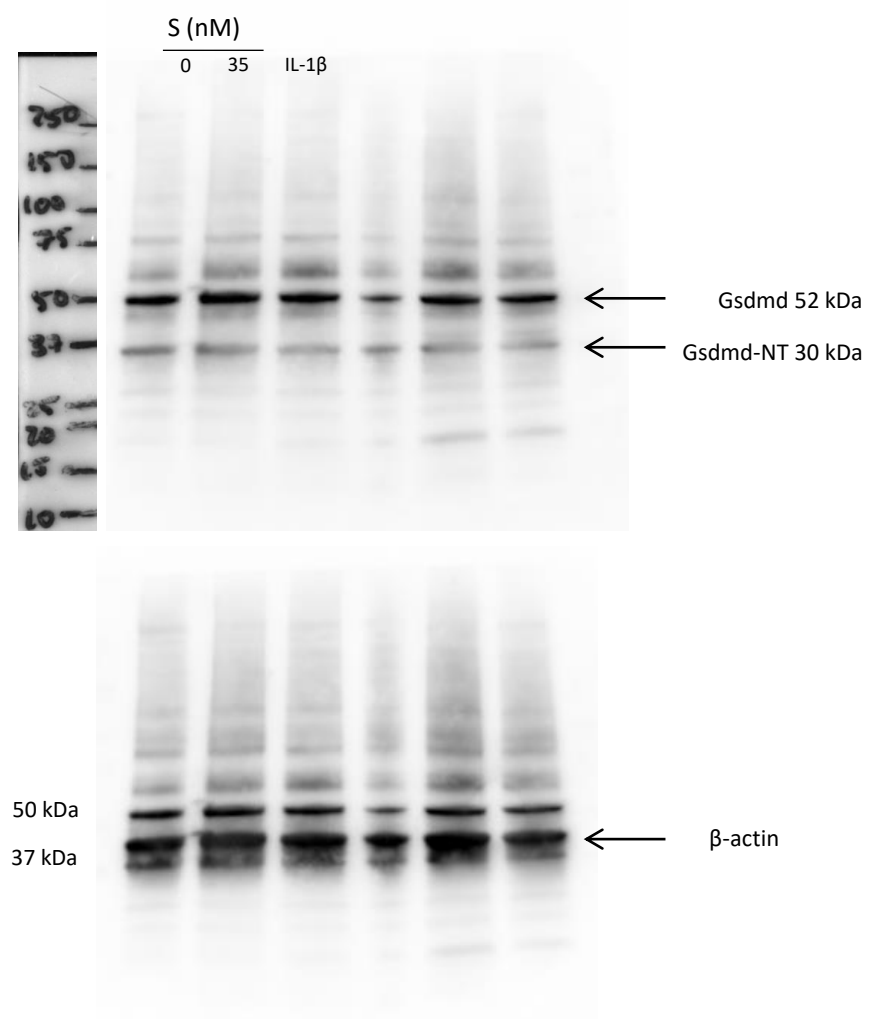

Figure 3

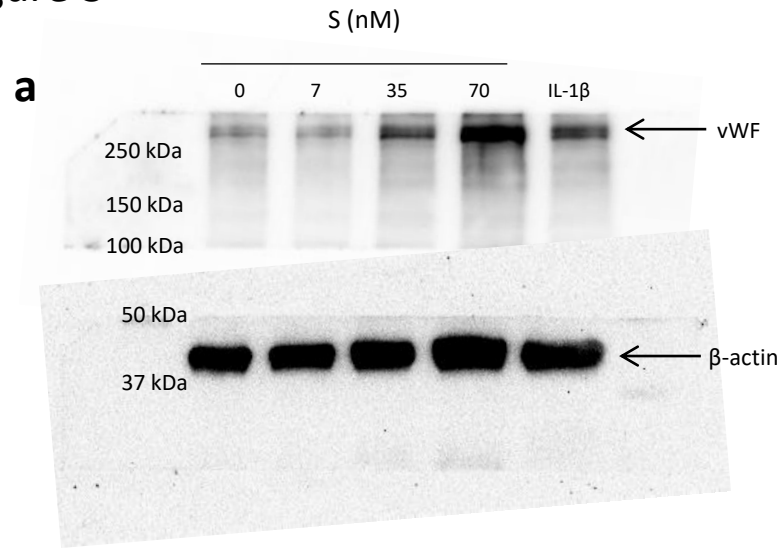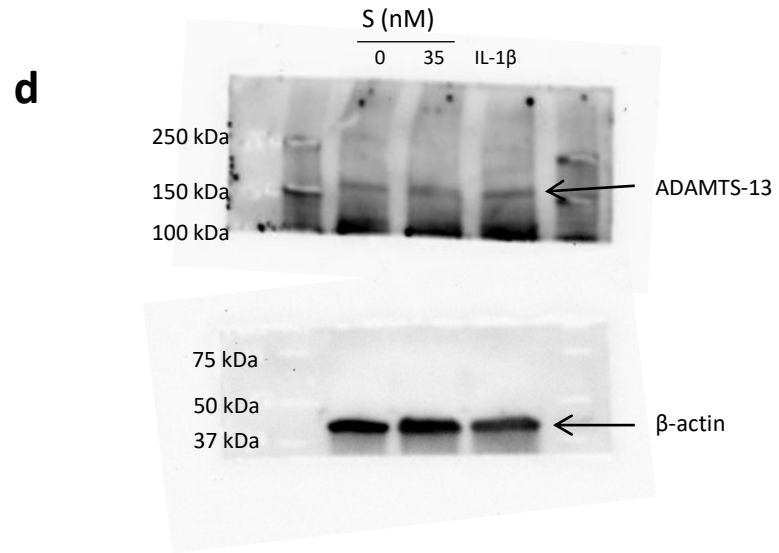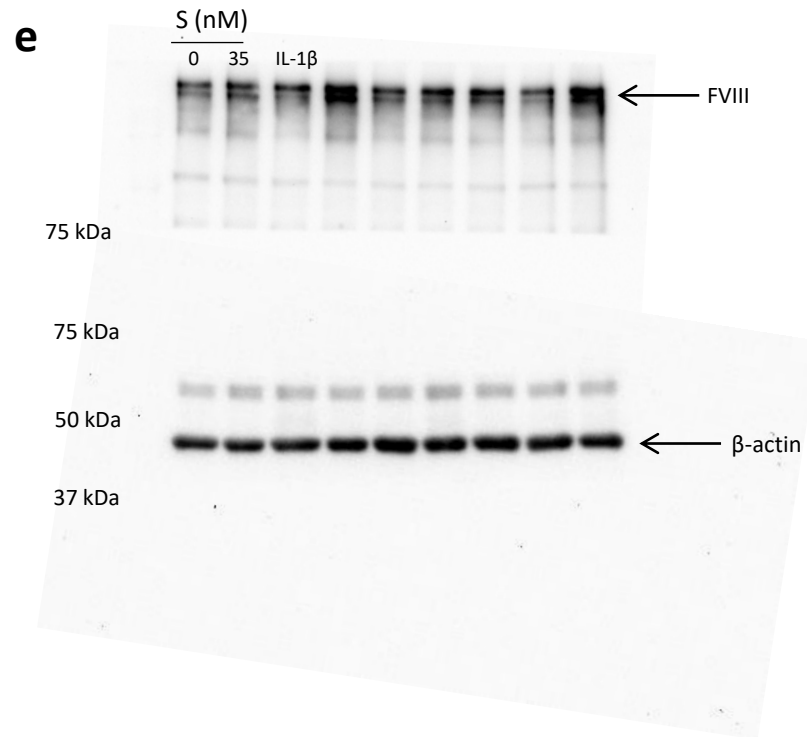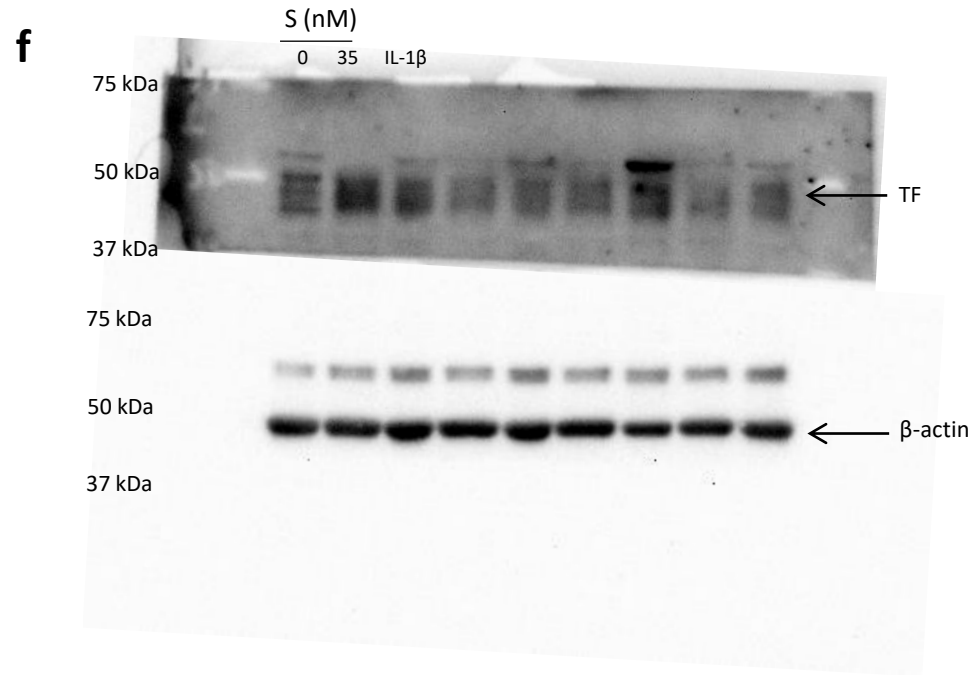

# Supplementry Figure 2B

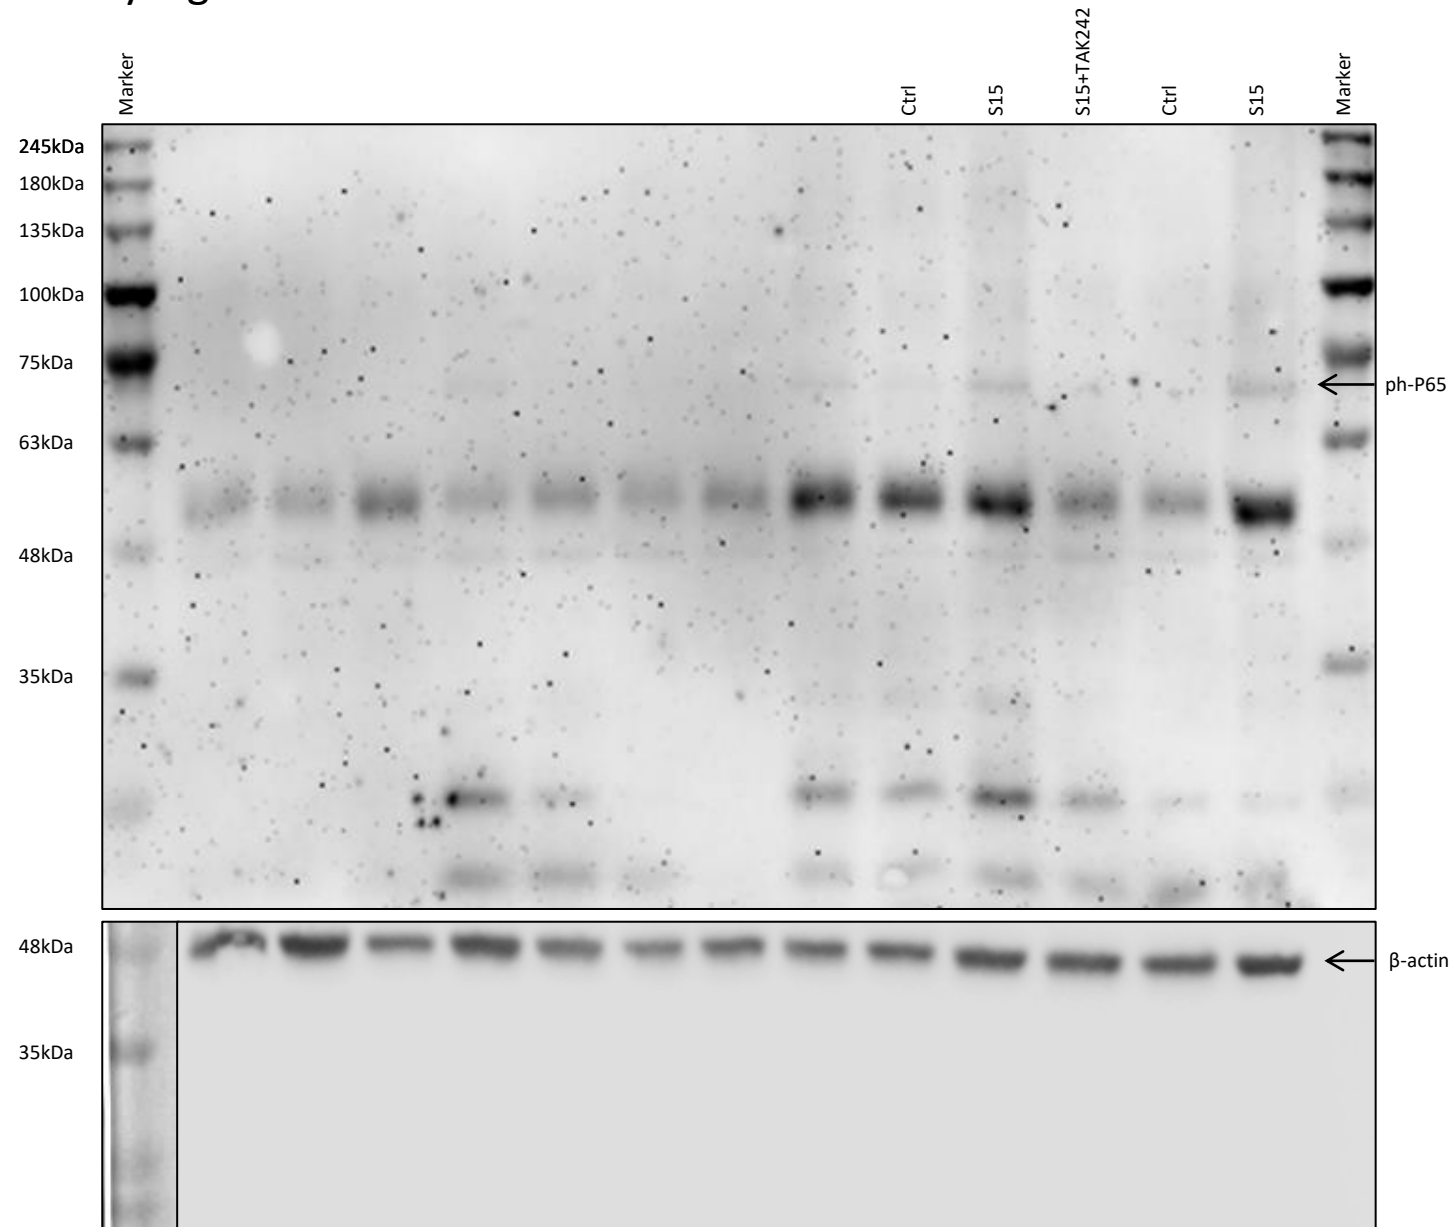

Supplemental Figure 4A

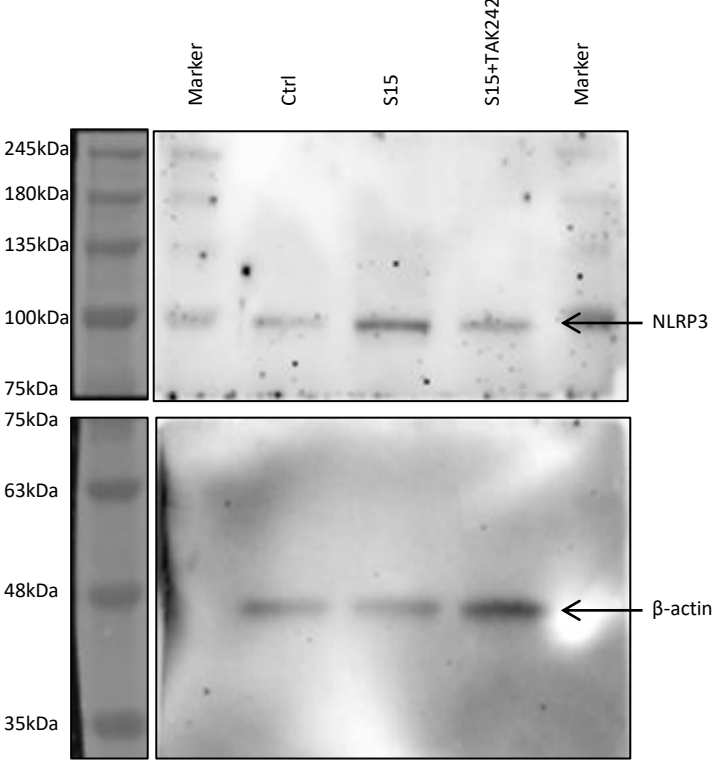

Supplemental Figure 4C

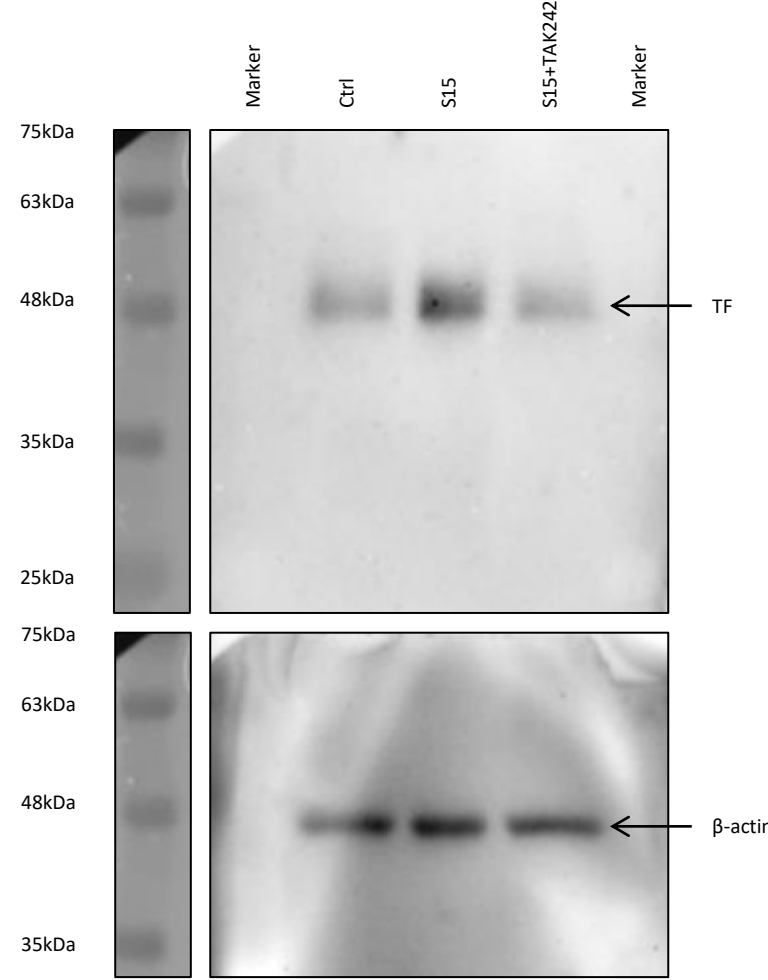

Supplement: 12964_2023_1397_MOESM2_ESM.pdf [file 12964_2023_1397_MOESM2_ESM.pdf]
